# Supplementary figures and images for: Extracellular Vesicle Measurements with Nanoparticle Tracking Analysis: A Different Appreciation of Up and Down Secretion
Source: MDPI journal article supplement (doi:10.3390/ijms23042310), 2022-02-19

# A

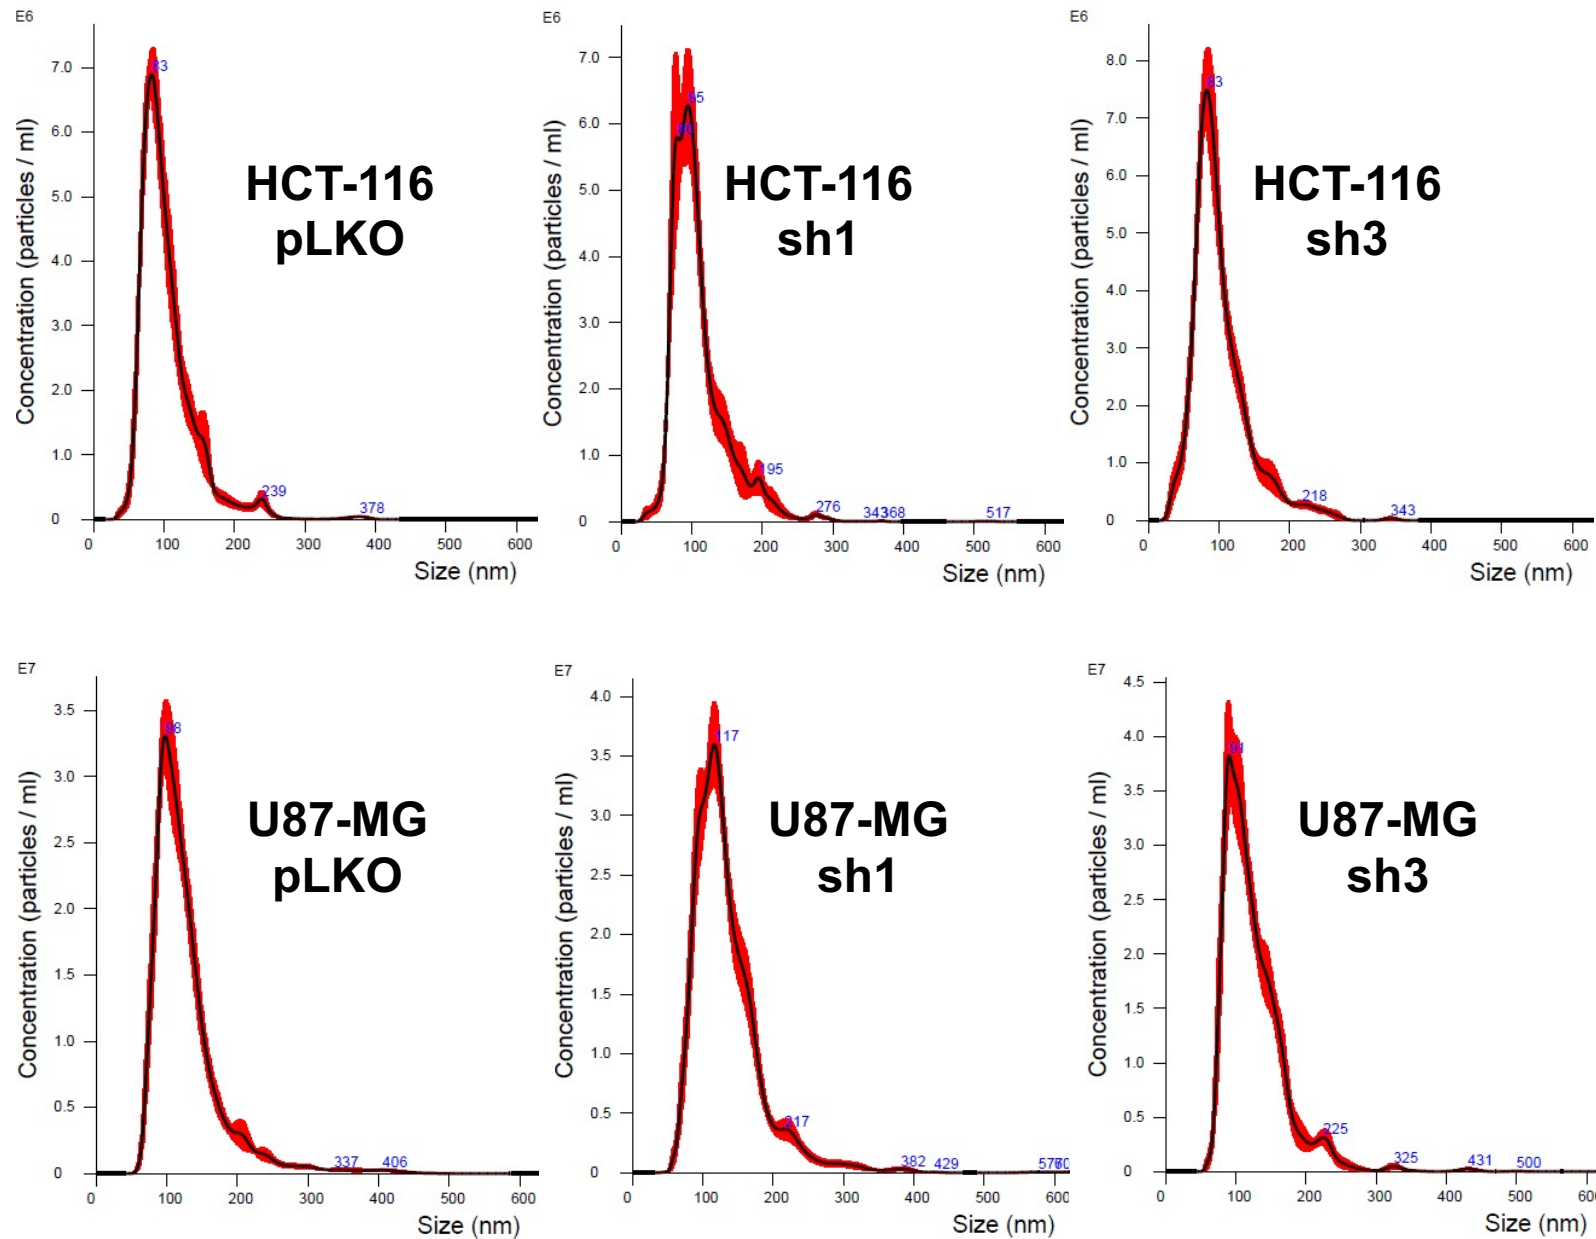

**B**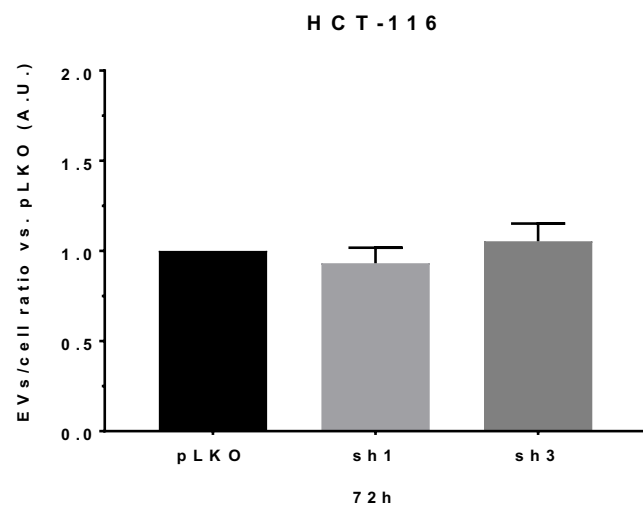**C**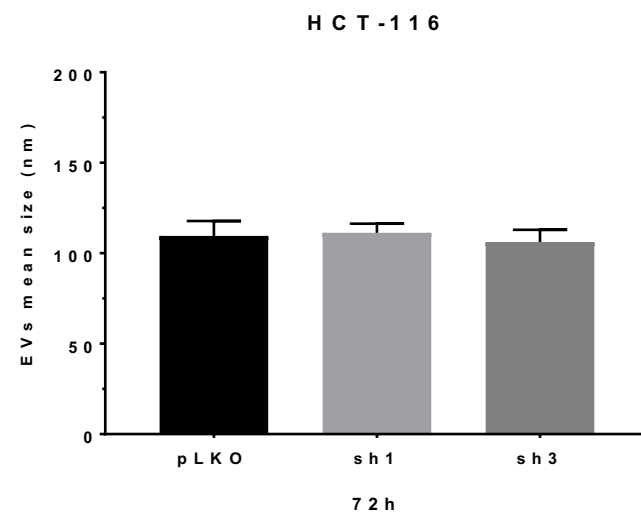**D**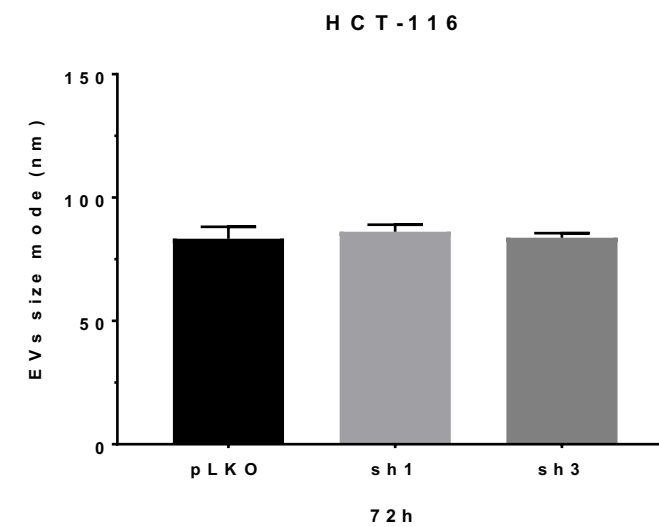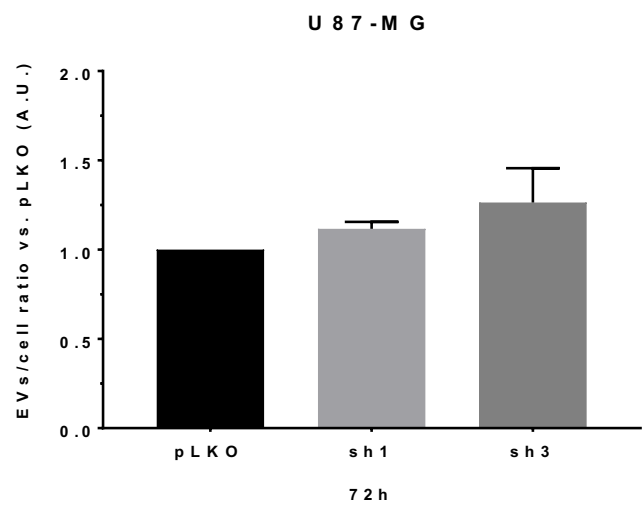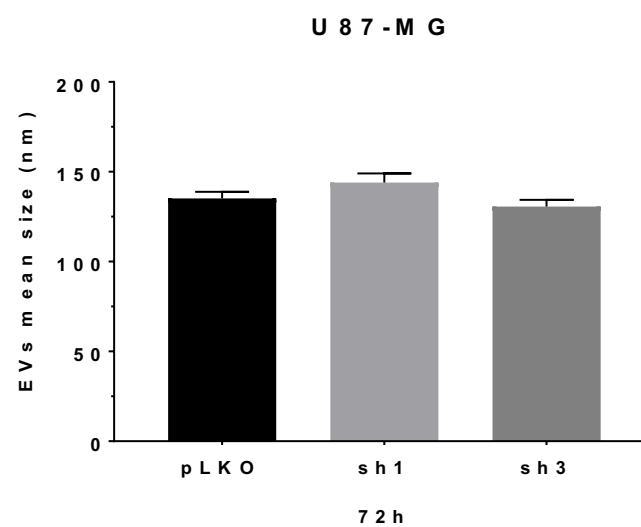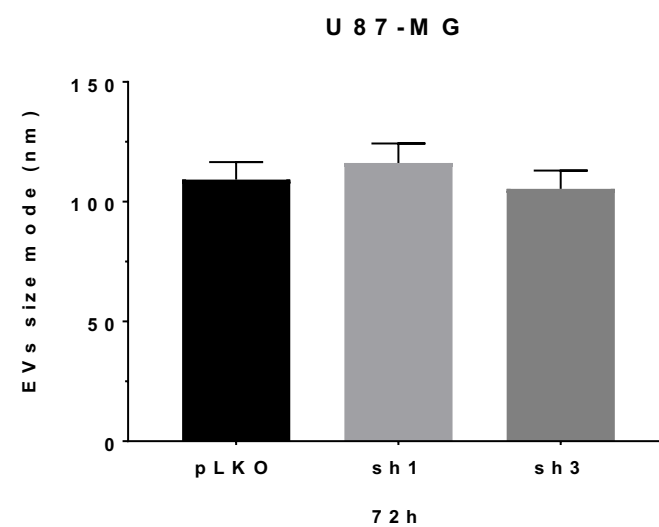

**E**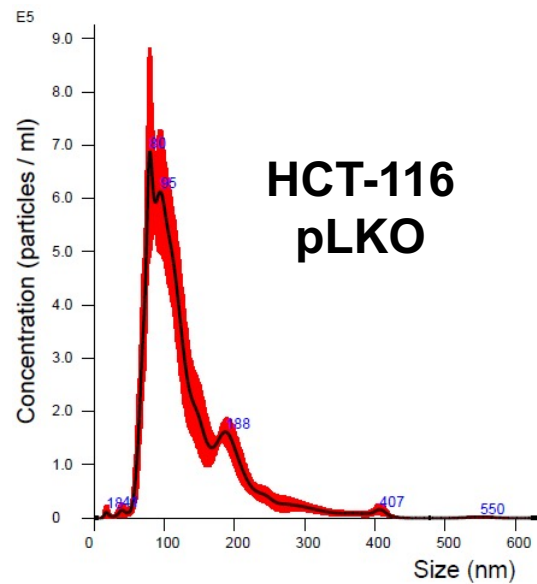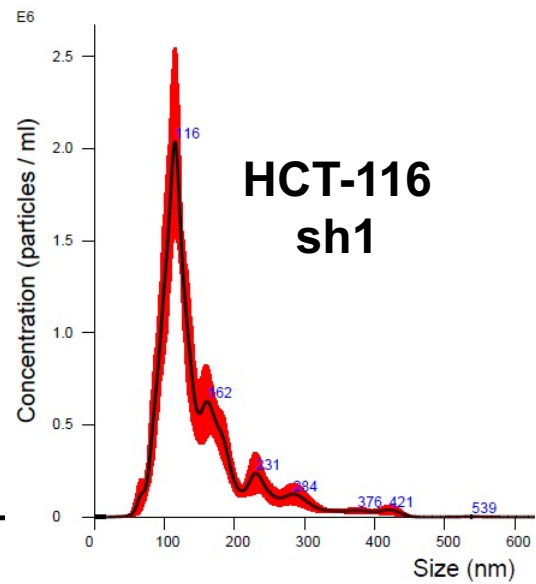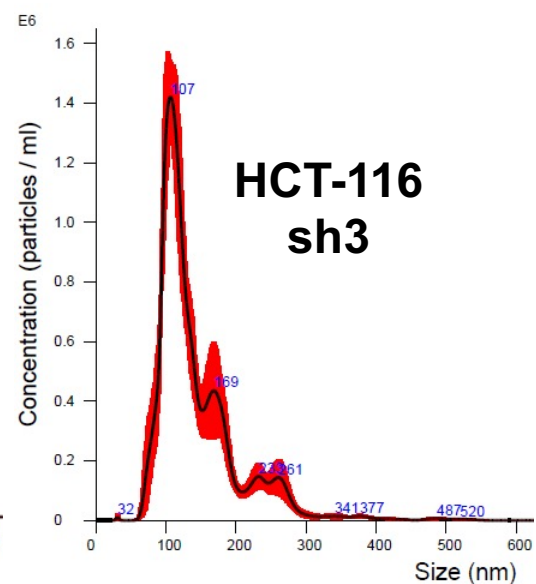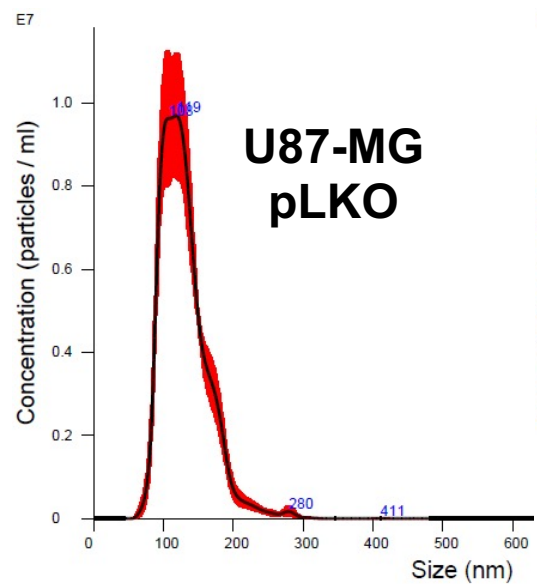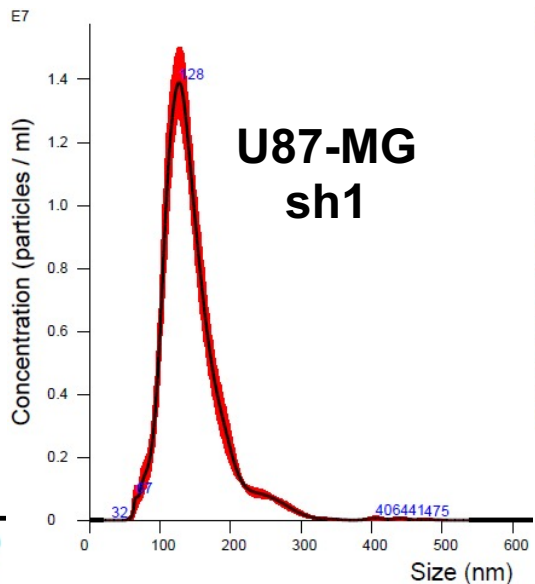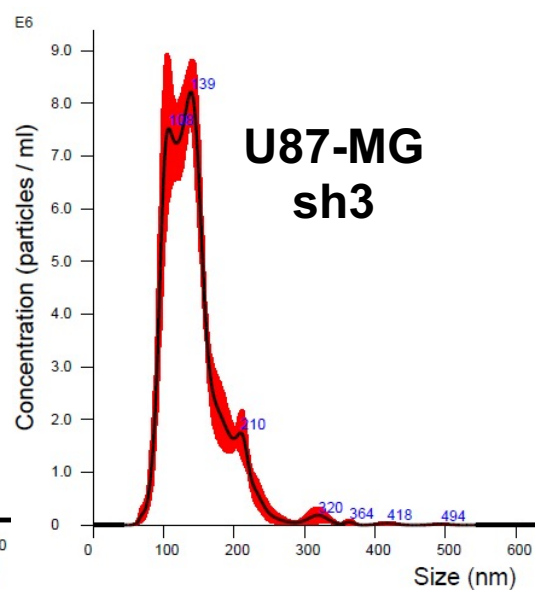

F

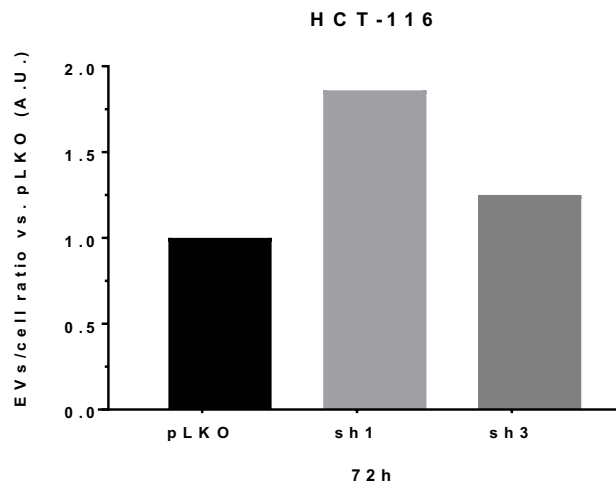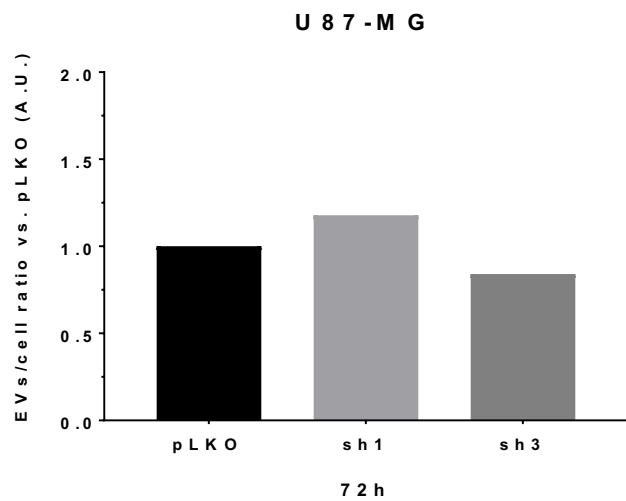

G

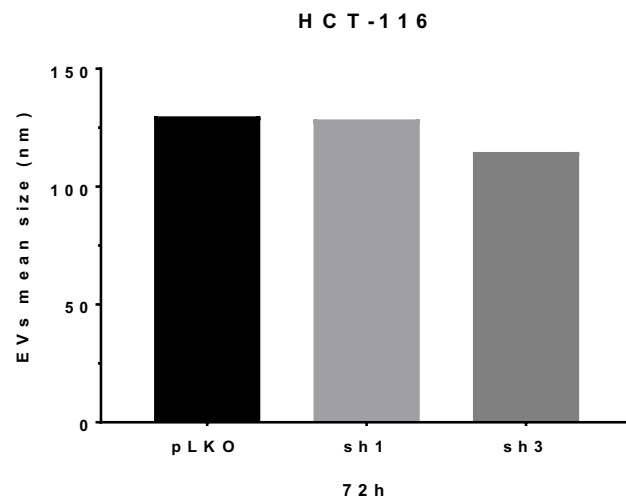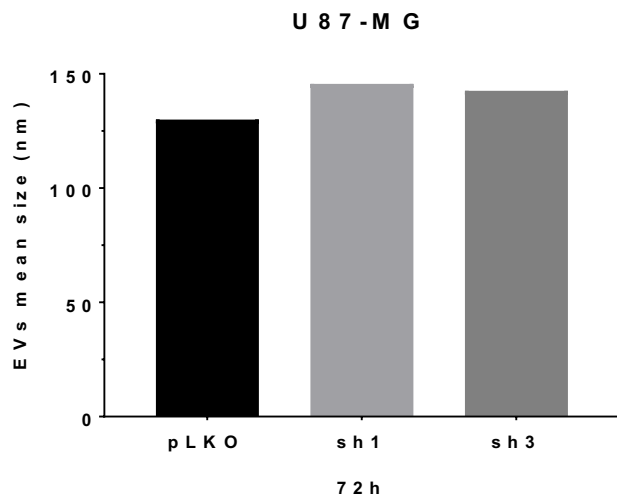

H

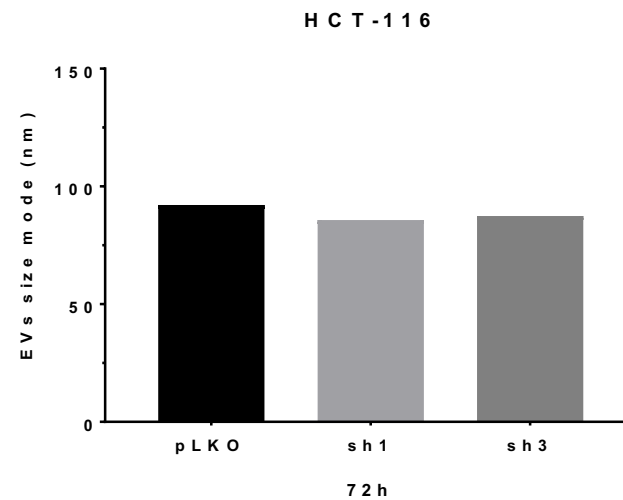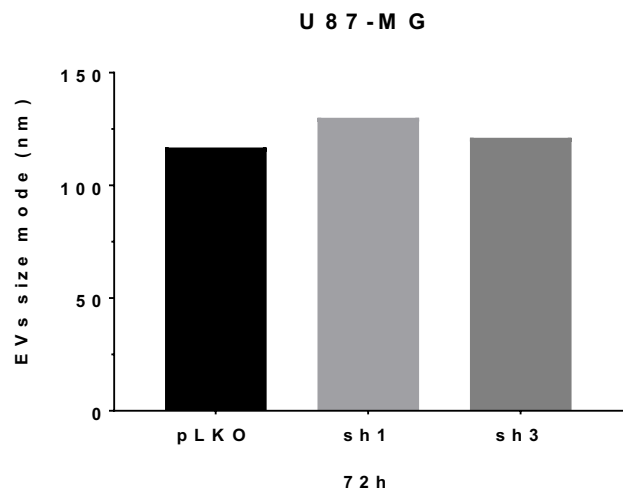

**A****HCT-116**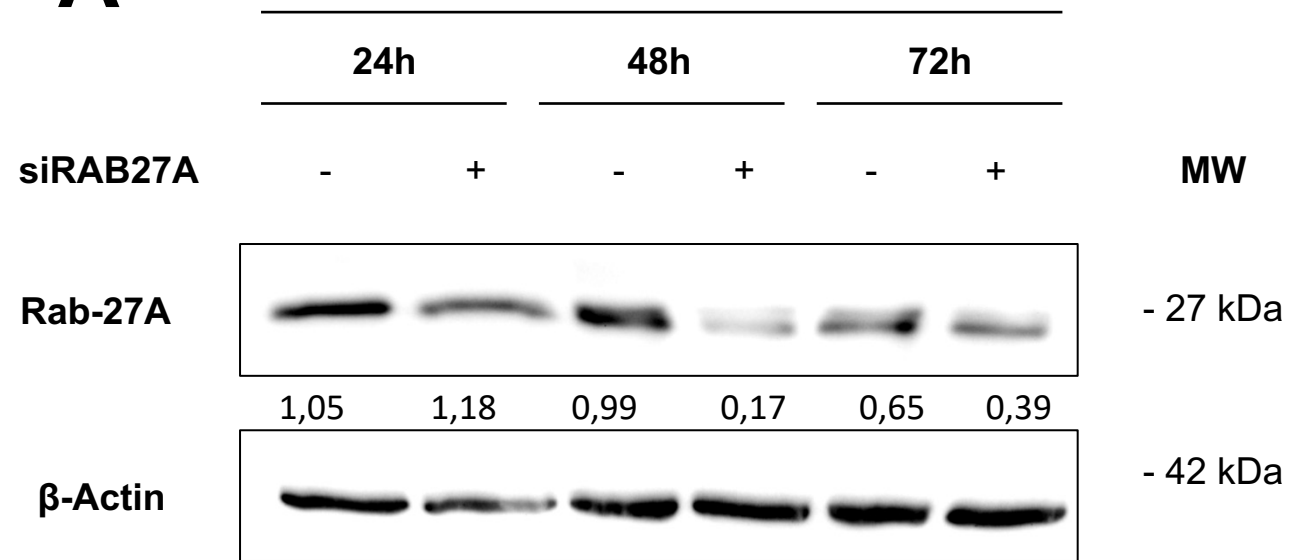**U87-MG**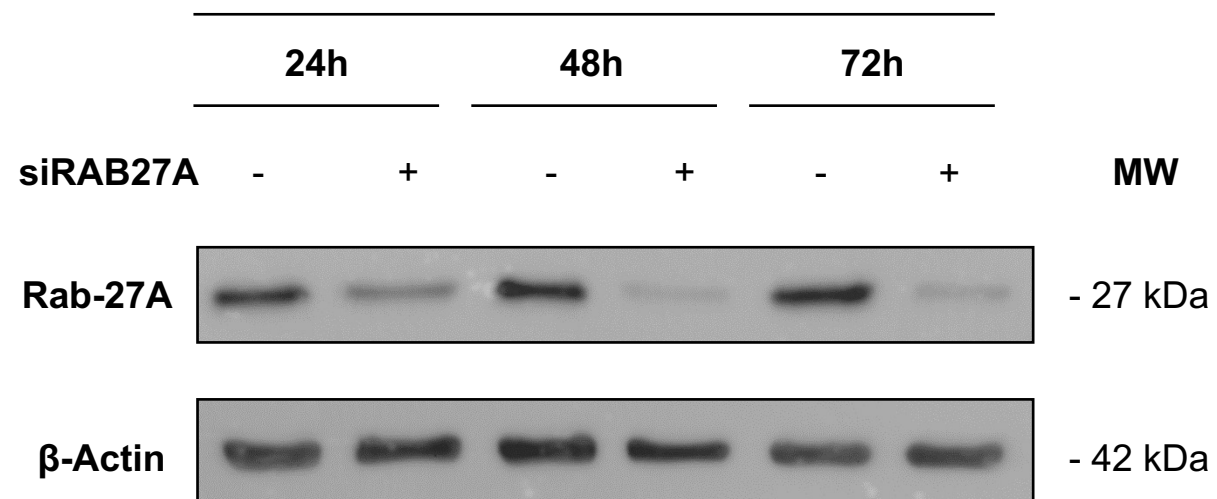

**B****HCT-116**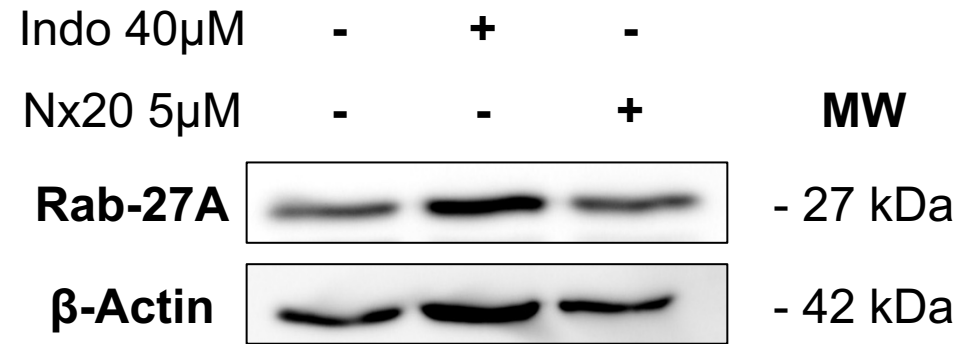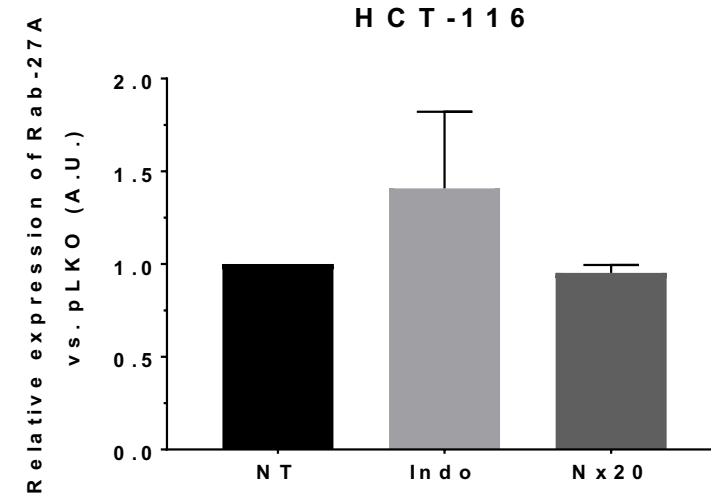**U87-pLKO**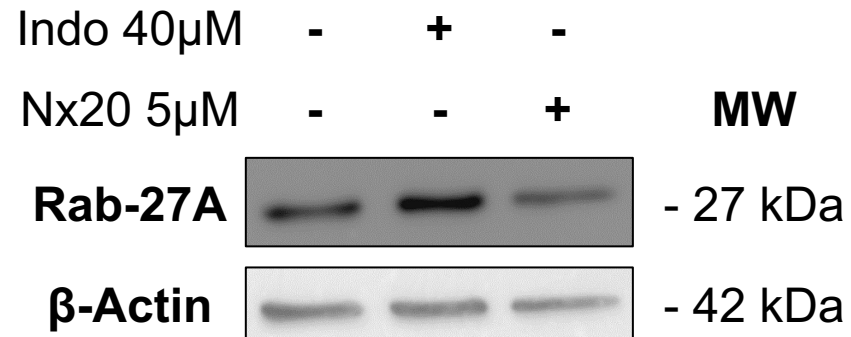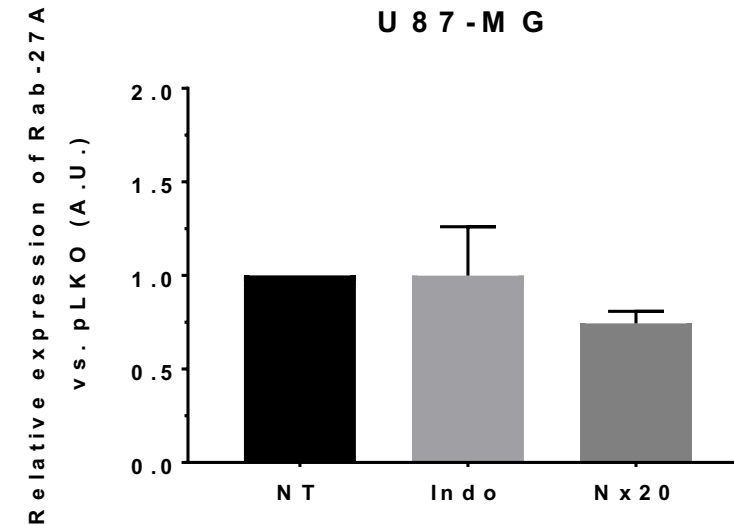

**A**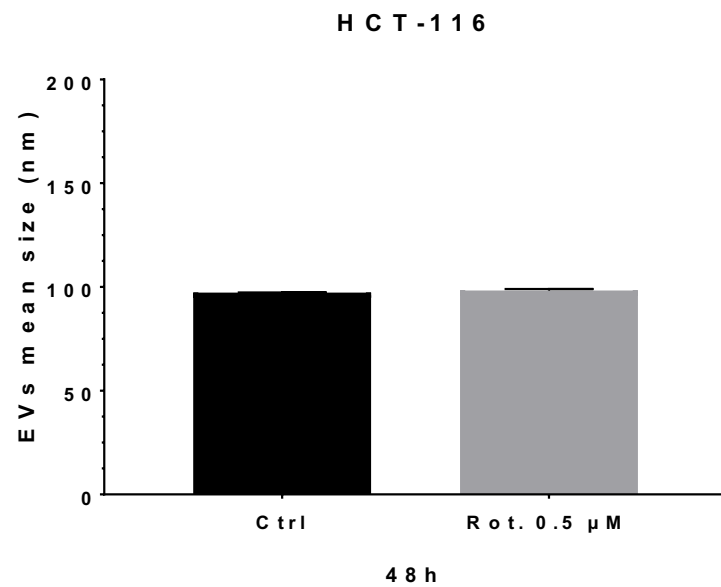**B**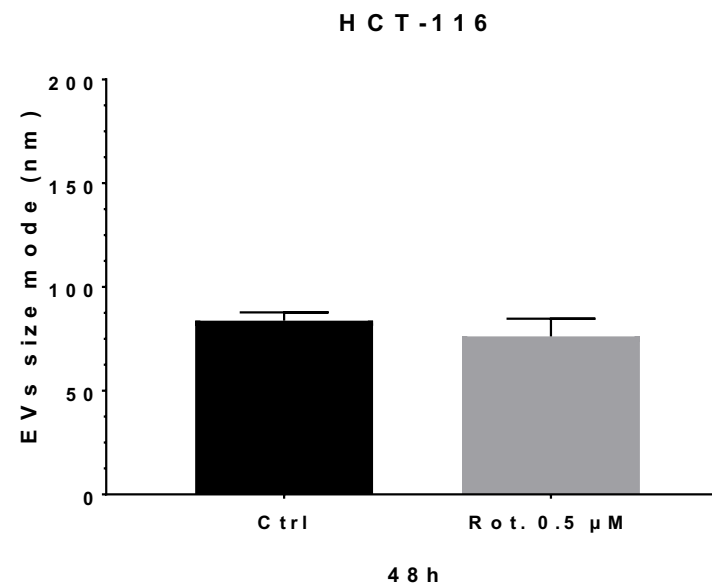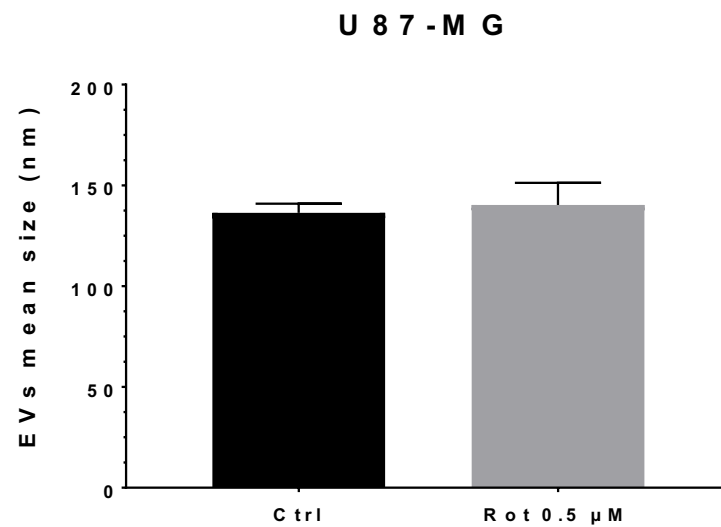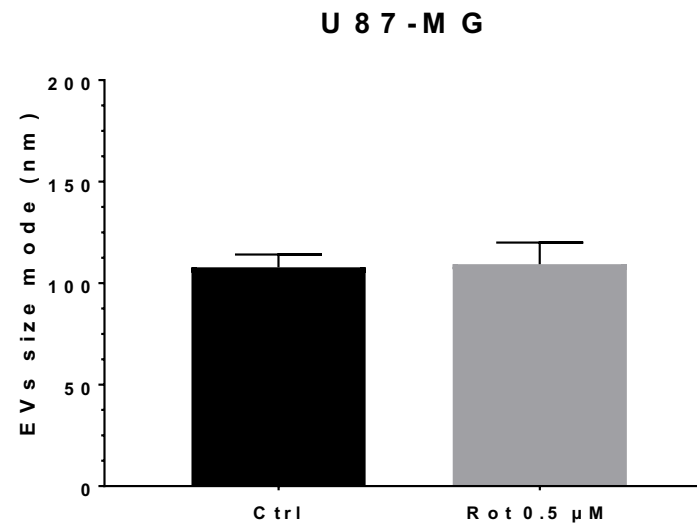

**C**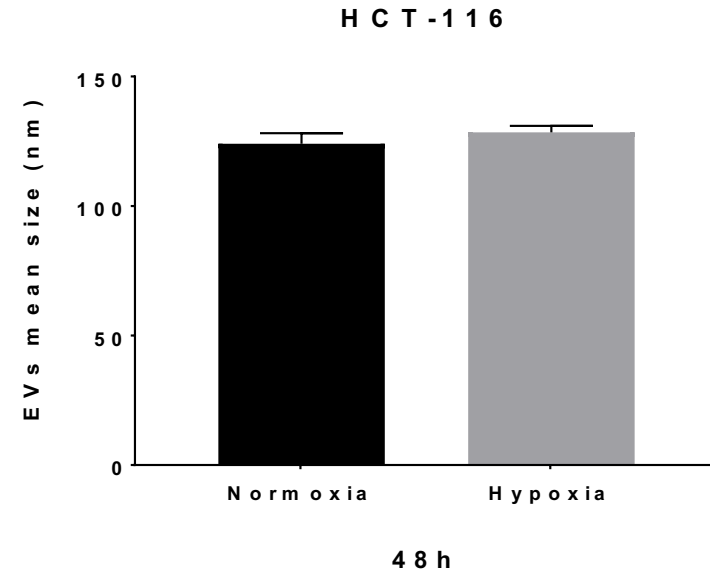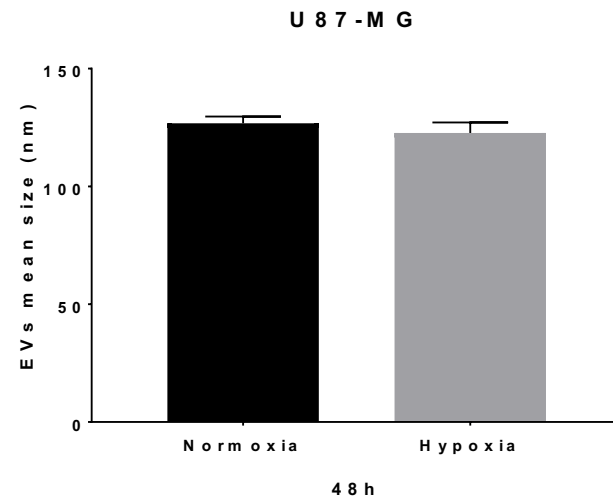**D**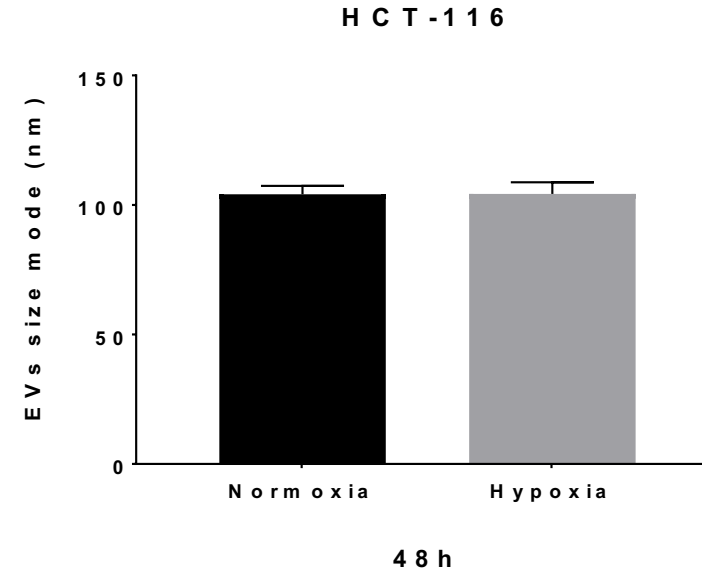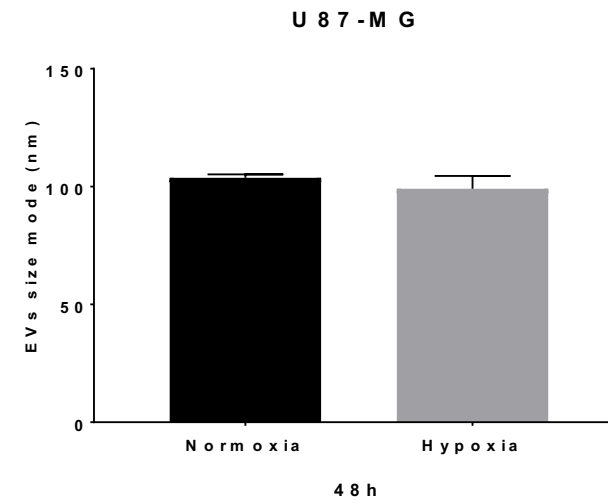



**A**

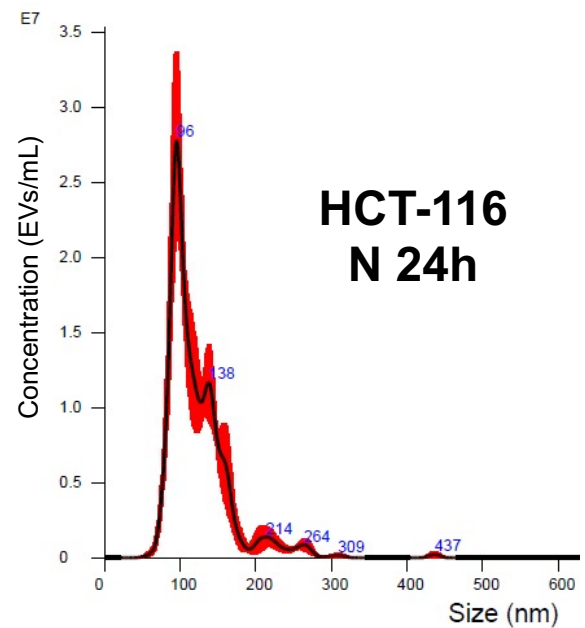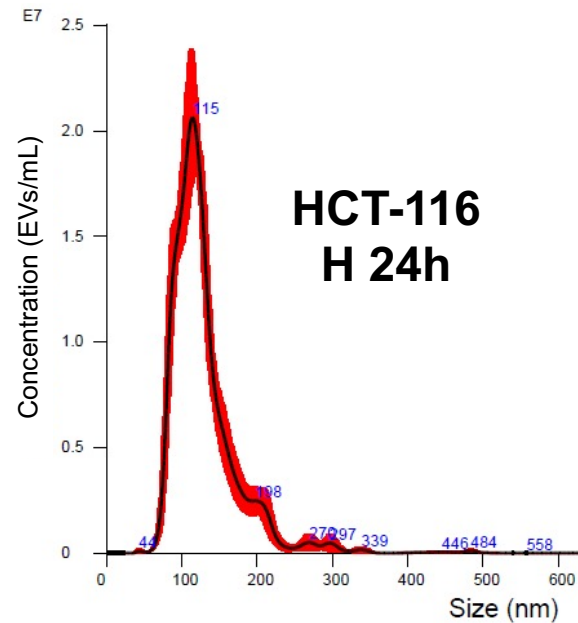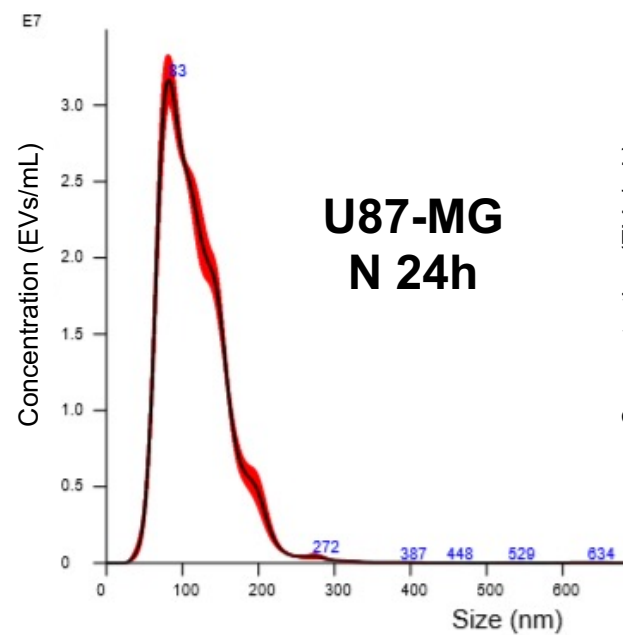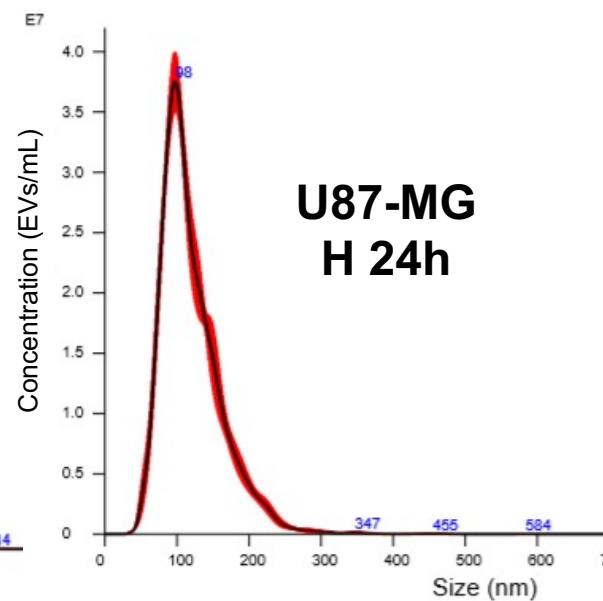

**B**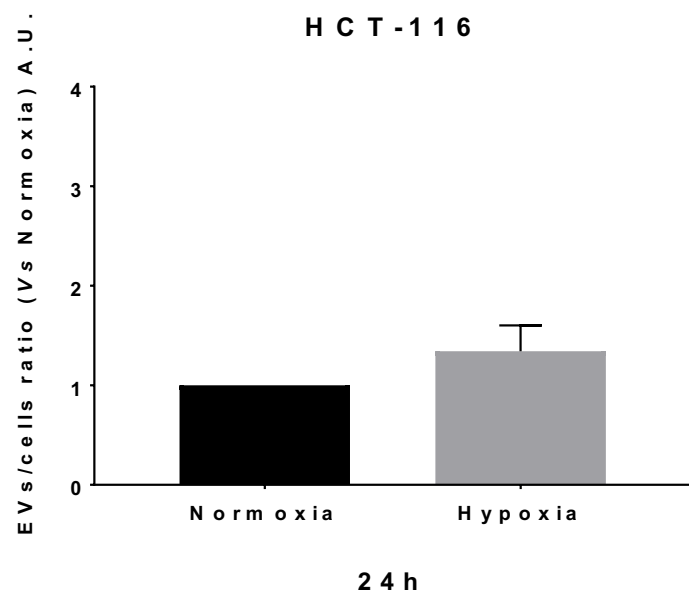**C**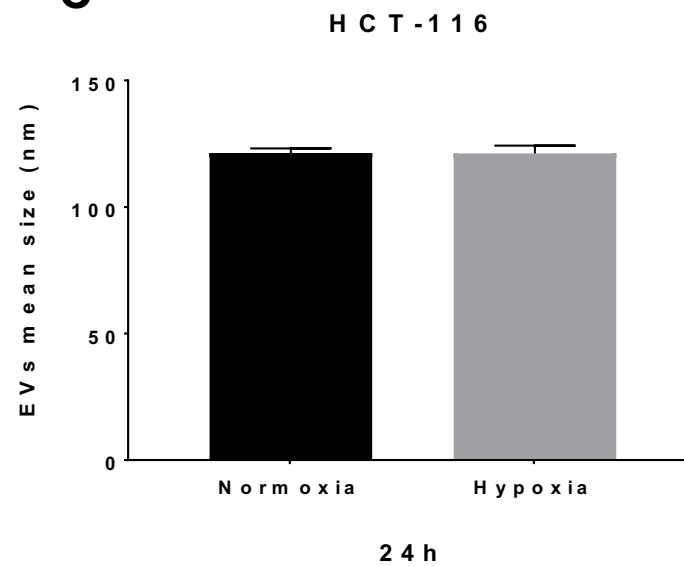**D**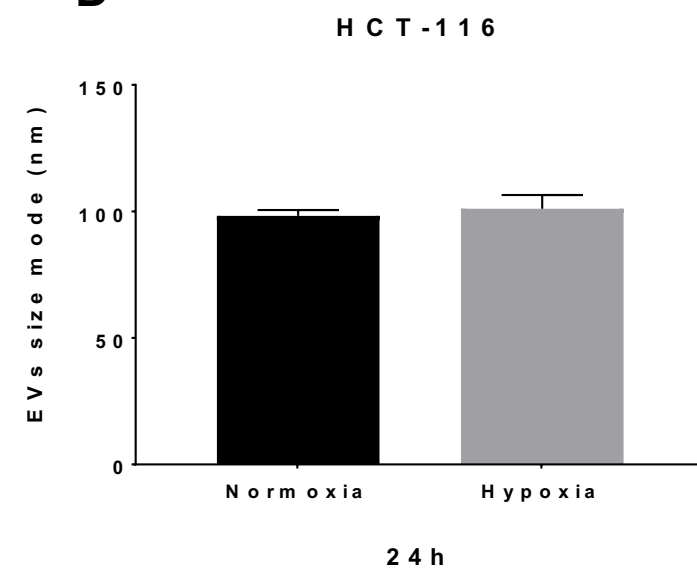**U 8 7 -M G**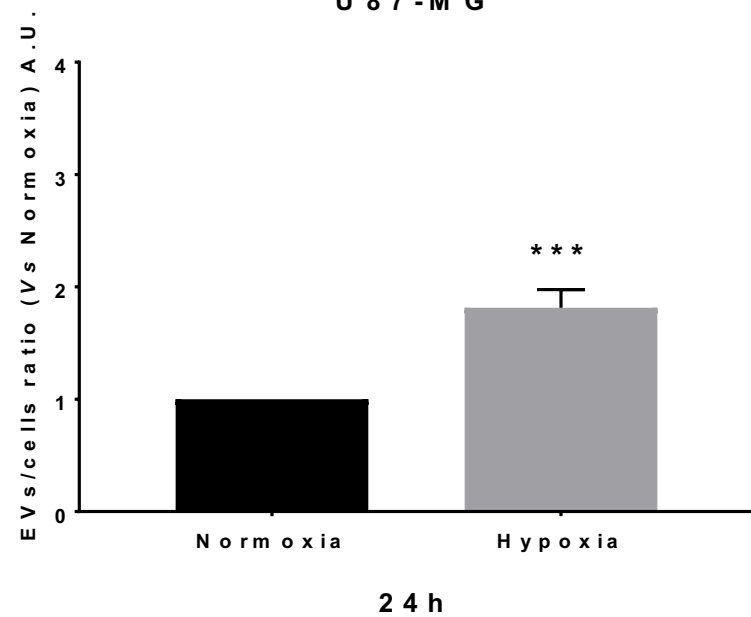**U 8 7 -M G**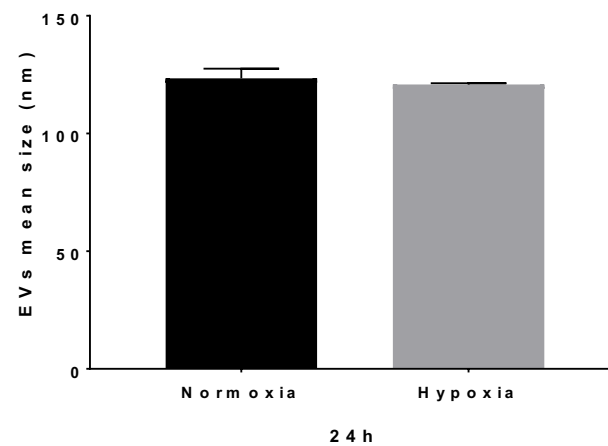**U 8 7 -M G**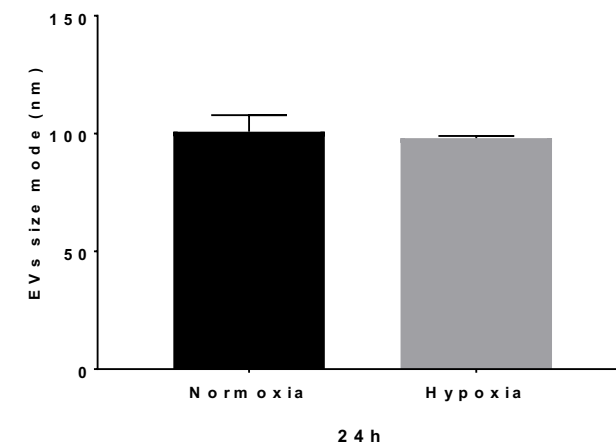

Supplement: s1 [file s1]
